# Supplementary material
Source: ML conference proceedings conference paper supplement (https://proceedings.neurips.cc/paper_files/paper/2023/hash/7f64034009f4a5fa417a57e1a987c5cd-Abstract.html)
Supplement: Supplementary file 1 [file 7f64034009f4a5fa417a57e1a987c5cd-Supplemental-Conference.pdf]

---

# Probabilistic Exponential Integrators — Appendix

---

## 398 **A Proof of Proposition 1: Structure of the transition matrix**

399 *Proof of Proposition 1.* The drift-matrix  $A_{\text{IOWP}(d,q)}$  as given in Eq. (21) has block structure

$$A_{\text{IOWP}(d,q)} = \begin{bmatrix} A_{\text{IWP}(d,q-1)} & E_{q-1} \\ 0 & L \end{bmatrix}, \quad (31)$$

400 where  $E_{q-1} := [0 \ \dots \ 0 \ I_d]^\top \in \mathbb{R}^{dq \times d}$ . From Van Loan [47, Theorem 1], it follows

$$\Phi(h) = \begin{bmatrix} \exp(A_{\text{IWP}(d,q-1)}h) & \Phi_{12}(h) \\ 0 & \exp(Lh) \end{bmatrix}, \quad (32)$$

401 which is precisely Eq. (23). The same theorem also gives  $\Phi_{12}(h)$  as

$$\Phi_{12}(h) = \int_0^h \exp(A_{\text{IWP}(d,q-1)}(h-\tau)) E_{q-1}^{(d-1)} \exp(L\tau) d\tau. \quad (33)$$

402 Its  $i$ th  $d \times d$  block is readily given by

$$\begin{aligned} (\Phi_{12}(h))_i &= \int_0^h E_i^\top \exp(A_{\text{IWP}(d,q-1)}(h-\tau)) E_{q-1} \exp(L\tau) d\tau \\ &= \int_0^h \frac{(h-\tau)^{q-1-i}}{(q-1-i)!} \exp(L\tau) d\tau \\ &= h^{q-i} \int_0^1 \frac{\tau^{q-1-i}}{(q-1-i)!} \exp(Lh(1-\tau)) d\tau \\ &= h^{q-i} \varphi_{q-i}(Lh), \end{aligned} \quad (34)$$

403 where the second last equality used the change of variables  $\tau = h(1-u)$ , and the last line follows by  
404 definition.  $\square$

## 405 **B Proof of Proposition 2: Equivalence to a classic exponential integrator**

406 We first briefly recapitulate the probabilistic exponential integrator setup for the case of the once  
407 integrated Ornstein–Uhlenbeck process, and then provide some auxiliary results. Then, we prove  
408 Proposition 2 in Appendix B.3.

### 409 **B.1 The probabilistic exponential integrator with once-integrated Ornstein–Uhlenbeck prior**

410 The integrated Ornstein–Uhlenbeck process prior with rate parameter  $L$  results in transition densities  
411  $Y(t+h) \mid Y(t) \sim \mathcal{N}(Y(t+h); \Phi(h)Y(t), Q(h))$ , with transition matrices (from Proposition 1)

$$\Phi(h) = \exp(Ah) = \begin{bmatrix} I & h\varphi_1(Lh) \\ 0 & \varphi_0(Lh) \end{bmatrix}, \quad (35)$$

$$Q(h) = \int_0^h \exp(A\tau) B B^\top \exp(A^\top \tau) d\tau \quad (36)$$

$$= \int_0^h \begin{bmatrix} I & \tau\varphi_1(L\tau) \\ 0 & \varphi_0(L\tau) \end{bmatrix} \begin{bmatrix} 0 & 0 \\ 0 & I \end{bmatrix} \begin{bmatrix} I & \tau\varphi_1(L\tau) \\ 0 & \varphi_0(L\tau) \end{bmatrix}^\top d\tau \quad (37)$$

$$= \int_0^h \begin{bmatrix} \tau^2 \varphi_1(L\tau) \varphi_1(L\tau)^\top & \tau \varphi_1(L\tau) \varphi_0(L\tau)^\top \\ \tau \varphi_0(L\tau) \varphi_1(L\tau)^\top & \varphi_0(L\tau) \varphi_0(L\tau)^\top \end{bmatrix} d\tau, \quad (38)$$

where we assume a unit diffusion  $\sigma^2 = 1$ . To simplify notation, we assume an equidistant time grid  $\mathbb{T} = \{t_n\}_{n=0}^N$  with  $t_n = n \cdot h$  for some step size  $h$ , and we denote the constant transition matrices simply by  $\Phi$  and  $Q$  and write  $Y_n = Y(t_n)$ .

Before getting to the actual proof, let us also briefly recapitulate the filtering formulas that are computed at each solver step. Given a Gaussian distribution  $Y_n \sim \mathcal{N}(Y_n; \mu_n, \Sigma_n)$ , the prediction step computes

$$\mu_{n+1}^- = \Phi \mu_n, \quad (39)$$

$$\Sigma_{n+1}^- = \Phi(h) \Sigma_n \Phi(h)^\top + Q(h). \quad (40)$$

Then, the combined linearization and correction step compute

$$\hat{z}_{n+1} = E_1 \mu_{n+1}^- - f(E_0 \mu_{n+1}^-), \quad (41)$$

$$S_{n+1} = H \Sigma_{n+1}^- H^\top, \quad (42)$$

$$K_{n+1} = \Sigma_{n+1}^- H^\top S_{n+1}^{-1}, \quad (43)$$

$$\mu_{n+1} = \mu_{n+1}^- - K_{n+1} \hat{z}_{n+1}, \quad (44)$$

$$\Sigma_{n+1} = \Sigma_{n+1}^- - K_{n+1} S_{n+1} K_{n+1}^\top, \quad (45)$$

with observation matrix  $H = E_1 - L E_0 = [-L \quad I]$ , since we perform the proposed EKL linearization.

## B.2 Auxiliary results

In the following, we show some properties of the transition matrices and the covariances that will be needed in the proof of Proposition 2 later.

First, note that by defining  $\varphi_0(z) = \exp z$ , the  $\varphi$ -functions satisfy the following recurrence formula:

$$z \varphi_k(z) = \varphi_{k-1}(z) - \frac{1}{(k-1)!}. \quad (46)$$

See e.g. Hochbruck and Ostermann [14]. This property will be used throughout the remainder of the section.

**Lemma B.1.** *The transition matrices  $\Phi(h)$ ,  $Q(h)$  of the once integrated Ornstein–Uhlenbeck process with rate parameter  $L$  satisfy*

$$H \Phi(h) = [-L \quad I], \quad (47)$$

$$Q(h) H^\top = \begin{bmatrix} h^2 \varphi_2(Lh) \\ h \varphi_1(Lh) \end{bmatrix}, \quad (48)$$

$$H Q(h) H^\top = h I, \quad (49)$$

*Proof.*

$$H \Phi(h) = (E_1 - L E_0) \begin{bmatrix} I & h \varphi_1(Lh) \\ 0 & \varphi_0(Lh) \end{bmatrix} = [0 \quad \varphi_0(Lh)] - L [I \quad h \varphi_1(Lh)] = [-L \quad I]. \quad (50)$$

428

$$Q(h) H^\top = \int_0^h \begin{bmatrix} \tau^2 \varphi_1(L\tau) \varphi_1(L\tau)^\top & \tau \varphi_1(L\tau) \varphi_0(L\tau)^\top \\ \tau \varphi_0(L\tau) \varphi_1(L\tau)^\top & \varphi_0(L\tau) \varphi_0(L\tau)^\top \end{bmatrix} H^\top d\tau \quad (51)$$

$$= \int_0^h \begin{bmatrix} \tau \varphi_1(L\tau) \varphi_0(L\tau)^\top - L \tau^2 \varphi_1(L\tau) \varphi_1(L\tau)^\top \\ \varphi_0(L\tau) \varphi_0(L\tau)^\top - L \tau \varphi_0(L\tau) \varphi_1(L\tau)^\top \end{bmatrix} d\tau \quad (52)$$

$$= \int_0^h \begin{bmatrix} \tau \varphi_1(L\tau) (\varphi_0(L\tau)^\top - L \tau \varphi_1(L\tau)^\top) \\ \varphi_0(L\tau) (\varphi_0(L\tau)^\top - L \tau \varphi_1(L\tau)^\top) \end{bmatrix} d\tau \quad (53)$$

$$= \int_0^h \begin{bmatrix} \tau \varphi_1(L\tau) \\ \varphi_0(L\tau) \end{bmatrix} d\tau \quad (54)$$

$$= \begin{bmatrix} h^2 \varphi_2(Lh) \\ h \varphi_1(Lh) \end{bmatrix} \quad (55)$$

429 where we used  $L\tau\varphi_1(L\tau) = \varphi_0(L\tau) - I$ , and  $\partial_\tau [\tau^k \varphi_k(L\tau)] = \tau^{k-1} \varphi_{k-1}(L\tau)$ . It follows that

$$HQ(h)H^\top = H \begin{bmatrix} h^2 \varphi_2(Lh) \\ h \varphi_1(Lh) \end{bmatrix} = h(\varphi_1(Lh) - Lh\varphi_2(Lh)) = hI, \quad (56)$$

430 where we used  $L\tau\varphi_2(L\tau) = \varphi_1(L\tau) - I$ .  $\square$

431 **Lemma B.2.** *The prediction covariance  $\Sigma_{n+1}^-$  satisfies*

$$\Sigma_{n+1}^- H^\top = Q(h)H^\top. \quad (57)$$

432 *Proof.* First, since the observation model is noiseless, the filtering covariance  $\Sigma_n$  satisfies

$$H\Sigma_n = \begin{bmatrix} 0 & 0 \end{bmatrix}. \quad (58)$$

433 This can be shown directly from the correction step formula:

$$H\Sigma_n = H\Sigma_n^- - HK_n S_n K_n^\top \quad (59)$$

$$= H\Sigma_n^- - H(\Sigma_n^- H^\top S_n^{-1}) S_n K_n^\top \quad (60)$$

$$= H\Sigma_n^- - H\Sigma_n^- H^\top (H\Sigma_n^- H^\top)^{-1} S_n K_n^\top \quad (61)$$

$$= H\Sigma_n^- - IS_n K_n^\top \quad (62)$$

$$= H\Sigma_n^- - S_n (\Sigma_n^- H^\top S_n^{-1})^\top \quad (63)$$

$$= H\Sigma_n^- - S_n S_n^{-1} H\Sigma_n^- \quad (64)$$

$$= \begin{bmatrix} 0 & 0 \end{bmatrix}. \quad (65)$$

434 Next, since the observation matrix is  $H = \begin{bmatrix} -L & I \end{bmatrix}$ , the filtering covariance  $\Sigma_n$  is structured as

$$\Sigma_n = \begin{bmatrix} I \\ L \end{bmatrix} [\Sigma_n]_{00} \begin{bmatrix} I & L^\top \end{bmatrix}. \quad (66)$$

435 This can be shown directly from Eq. (58):

$$\begin{bmatrix} 0 & 0 \end{bmatrix} = H\Sigma = \begin{bmatrix} -L & I \end{bmatrix} \begin{bmatrix} \Sigma_{00} & \Sigma_{01} \\ \Sigma_{10} & \Sigma_{11} \end{bmatrix} = \begin{bmatrix} \Sigma_{10} - L\Sigma_{00} & \Sigma_{11} - L\Sigma_{01} \end{bmatrix}, \quad (67)$$

436 and thus

$$\Sigma_{10} = L\Sigma_{00}, \quad (68)$$

$$\Sigma_{11} = L\Sigma_{01} = L\Sigma_{10}^\top = L\Sigma_{00}L^\top. \quad (69)$$

437 It follows

$$\Sigma = \begin{bmatrix} \Sigma_{00} & L\Sigma_{00} \\ \Sigma_{00}L^\top & L\Sigma_{00}L^\top \end{bmatrix} = \begin{bmatrix} I \\ L \end{bmatrix} \Sigma_{00} \begin{bmatrix} I & L^\top \end{bmatrix}. \quad (70)$$

438 Finally, together with Lemma B.1 we can derive the result:

$$\Sigma_{n+1}^- H^\top = \Phi(h)\Sigma_n\Phi(h)^\top H^\top + Q(h)H^\top \quad (71)$$

$$= \Phi(h) \begin{bmatrix} I \\ L \end{bmatrix} \bar{\Sigma}_n \begin{bmatrix} I & L^\top \end{bmatrix} \begin{bmatrix} -L^\top \\ I \end{bmatrix} + Q(h)H^\top \quad (72)$$

$$= \Phi(h) \begin{bmatrix} I \\ L \end{bmatrix} \bar{\Sigma}_n \cdot 0 + Q(h)H^\top \quad (73)$$

$$= Q(h)H^\top. \quad (74)$$

439  $\square$

### 440 B.3 Proof of Proposition 2

441 With these results, we can now prove Proposition 2.

442 *Proof of Proposition 2.* We prove the proposition by induction, showing that the filtering means are  
443 all of the form

$$\mu_n := \begin{bmatrix} y_n \\ Ly_n + N(\tilde{y}_n) \end{bmatrix}, \quad (75)$$

444 where  $y_n, \tilde{y}_n$  are defined as

$$\tilde{y}_0 := y_0, \quad (76)$$

$$\tilde{y}_{n+1} := \varphi_0(Lh)y_n + h\varphi_1(Lh)N(\tilde{y}_n), \quad (77)$$

$$y_{n+1} := \varphi_0(Lh)y_n + h\varphi_1(Lh)N(\tilde{y}_n) - h\varphi_2(Lh)(N(\tilde{y}_n) - N(\tilde{y}_{n+1})). \quad (78)$$

445 This result includes the statement of Proposition 2.

446 **Base case**  $n = 0$  The initial distribution of the probabilistic solver is chosen as

$$\mu_0 = \begin{bmatrix} y_0 \\ Ly_0 + N(\tilde{y}_0) \end{bmatrix}, \Sigma_0 = 0. \quad (79)$$

447 This proves the base case  $n = 0$ .

448 **Induction step**  $n \rightarrow n + 1$  Now, let

$$\mu_n = \begin{bmatrix} y_n \\ Ly_n + N(\tilde{y}_n) \end{bmatrix} \quad (80)$$

449 be the filtering mean at step  $n$  and  $\Sigma_n$  be the filtering covariance. The prediction mean is of the form

$$\mu_{n+1}^- = \Phi(h)\mu_n = \begin{bmatrix} y_n + h\varphi_1(Lh)(Ly_n + N(\tilde{y}_n)) \\ \varphi_0(Lh)(Ly_n + N(\tilde{y}_n)) \end{bmatrix} = \begin{bmatrix} \varphi_0(Lh)y_n + h\varphi_1(Lh)N(\tilde{y}_n) \\ \varphi_0(Lh)(Ly_n + N(\tilde{y}_n)) \end{bmatrix}. \quad (81)$$

450 The residual  $\hat{z}_{n+1}$  is then of the form

$$\hat{z}_{n+1} = E_1\mu_{n+1}^- - f(E_0\mu_{n+1}^-) \quad (82)$$

$$= \varphi_0(Lh)(Ly_n + N(\tilde{y}_n)) - f(\varphi_0(Lh)y_n + h\varphi_1(Lh)N(\tilde{y}_n)) \quad (83)$$

$$= \varphi_0(Lh)(Ly_n + N(\tilde{y}_n)) - L(\varphi_0(Lh)y_n + h\varphi_1(Lh)N(\tilde{y}_n)) - N(\tilde{y}_{n+1}) \quad (84)$$

$$= \varphi_0(Lh)Ly_n + \varphi_0(Lh)N(\tilde{y}_n) - L\varphi_0(Lh)y_n - Lh\varphi_1(Lh)N(\tilde{y}_n) - N(\tilde{y}_{n+1}) \quad (85)$$

$$= (\varphi_0(Lh) - Lh\varphi_1(Lh))N(\tilde{y}_n) - N(\tilde{y}_{n+1}) \quad (86)$$

$$= N(\tilde{y}_n) - N(\tilde{y}_{n+1}), \quad (87)$$

$$(88)$$

451 where we used properties of the  $\varphi$ -functions, namely  $Lh\varphi_1(Lh) = \varphi_0(Lh)$  and the commutativity  
452  $\varphi_0(Lh)L = L\varphi_0(Lh)$ . With Lemma B.2, the residual covariance  $S_{n+1}$  and Kalman gain  $K_{n+1}$  are  
453 then of the form

$$S_{n+1} = H\Sigma_{n+1}^-H^\top = HQ(h)H^\top = hI, \quad (89)$$

$$K_{n+1} = \Sigma_{n+1}^-H^\top S_{n+1}^{-1} = Q(h)H^\top (hI)^{-1} = \begin{bmatrix} h\varphi_2(Lh) \\ \varphi_1(Lh) \end{bmatrix}. \quad (90)$$

454 This gives the updated mean

$$\mu_{n+1} = \mu_{n+1}^- - K_{n+1}\hat{z}_{n+1} \quad (91)$$

$$= \begin{bmatrix} \varphi_0(Lh)y_n + h\varphi_1(Lh)N(\tilde{y}_n) \\ \varphi_0(Lh)(Ly_n + N(\tilde{y}_n)) \end{bmatrix} - \begin{bmatrix} h\varphi_2(Lh) \\ \varphi_1(Lh) \end{bmatrix} (N(\tilde{y}_n) - N(\tilde{y}_{n+1})) \quad (92)$$

$$= \begin{bmatrix} \varphi_0(Lh)y_n + h\varphi_1(Lh)N(\tilde{y}_n) - h\varphi_2(Lh)(N(\tilde{y}_n) - N(\tilde{y}_{n+1})) \\ \varphi_0(Lh)(Ly_n + N(\tilde{y}_n)) - \varphi_1(Lh)(N(\tilde{y}_n) - N(\tilde{y}_{n+1})) \end{bmatrix}. \quad (93)$$

455 This proves the first half of the mean recursion:

$$E_0\mu_{n+1} = \varphi_0(Lh)y_n + h\varphi_1(Lh)N(\tilde{y}_n) - h\varphi_2(Lh)(N(\tilde{y}_n) - N(\tilde{y}_{n+1})) = y_{n+1}. \quad (94)$$

456 It is left to show that

$$E_1\mu_{n+1} = Ly_{n+1} - N(\tilde{y}_{n+1}). \quad (95)$$

457 Starting from the right-hand side, we have

$$Ly_{n+1} + N(\tilde{y}_{n+1}) \quad (96)$$

$$= L(\varphi_0(Lh)y_n + h\varphi_1(Lh)N(\tilde{y}_n) - h\varphi_2(Lh)(N(\tilde{y}_n) - N(\tilde{y}_{n+1}))) + N(\tilde{y}_{n+1}) \quad (97)$$

$$= \varphi_0(Lh)Ly_n + Lh\varphi_1(Lh)N(\tilde{y}_n) - Lh\varphi_2(Lh)(N(\tilde{y}_n) - N(\tilde{y}_{n+1}))N(\tilde{y}_{n+1}) \quad (98)$$

$$= \varphi_0(Lh)Ly_n + (\varphi_0(Lh) - I)N(\tilde{y}_n) - (\varphi_1(Lh) - I)(N(\tilde{y}_n) - N(\tilde{y}_{n+1}))N(\tilde{y}_{n+1}) \quad (99)$$

$$= \varphi_0(Lh)(Ly_n + N(\tilde{y}_n)) - \varphi_1(Lh)(N(\tilde{y}_n) - N(\tilde{y}_{n+1})) \quad (100)$$

$$= E_1\mu_{n+1}. \quad (101)$$

458 This concludes the proof of the mean recursion and thus shows the equivalence of the two recursions.

459  $\square$

## 460 C Proof of Proposition 3: L-stability

461 We first provide definitions of L-stability and A-stability, following [26, Section 8.6].

462 **Definition 1** (L-stability). *A one-step method is said to be L-stable if it is A-stable and, in addition,*  
 463 *when applied to the scalar test-equation  $\dot{y}(t) = \lambda y(t)$ ,  $\lambda \in \mathbb{C}$  a complex constant with  $\text{Re}(\lambda) < 0$ , it*  
 464 *yields  $y_{n+1} = R(h\lambda)y_n$ , and  $R(h\lambda) \rightarrow 0$  as  $\text{Re}(h\lambda) \rightarrow -\infty$ .*

465 **Definition 2** (A-stability). *A one-step method is said to be A-stable if its region of absolute stability*  
 466 *contains the whole of the left complex half-plane. That is, when applied to the scalar test-equation*  
 467  *$\dot{y}(t) = \lambda y(t)$  with  $\lambda \in \mathbb{C}$  a complex constant with  $\text{Re}(\lambda) < 0$ , the method yields  $y_{n+1} = R(h\lambda)y_n$ ,*  
 468 *and  $\{z \in \mathbb{C} : \text{Re}(z) < 0\} \subset \{z \in \mathbb{C} : R(z) < 1\}$ .*

469 *Proof of Proposition 3.* Both L-stability and A-stability directly follow from Remark 1: Since the  
 470 probabilistic exponential integrator solves linear ODEs exactly its stability function is the exponential  
 471 function, i.e.  $R(z) = \exp(z)$ . A-stability and L-stability then follow: Since  $\mathbb{C}^- \subset \{z : |R(z)| \leq 1\}$   
 472 holds the method is A-stable. And since  $|R(z)| \rightarrow 0$  as  $\text{Re}(z) \rightarrow -\infty$  the method is L-stable.  $\square$

## 473 D Experiment details

### 474 D.1 Burger's equation

475 Burger's equation is a semi-linear partial differential equation (PDE) of the form

$$\partial_t u(x, t) = -u(x, t)\partial_x u(x, t) + D\partial_x^2 u(x, t), \quad x \in \Omega, \quad t \in [0, T], \quad (102)$$

476 with diffusion coefficient  $D \in \mathbb{R}_+$ . We discretize the spatial domain  $\Omega$  on a finite grid and approxi-  
 477 mate the spatial derivatives with finite differences to obtain a semi-linear ODE of the form

$$\dot{y}(t) = D \cdot L \cdot y(t) + F(y(t)), \quad t \in [0, T], \quad (103)$$

478 with  $N$ -dimensional  $y(t) \in \mathbb{R}^N$ ,  $L \in \mathbb{R}^{N \times N}$  the finite difference approximation of the Laplace  
 479 operator  $\partial_x^2$ , and a non-linear part  $F$ .

480 More specifically, we consider a domain  $\Omega = (0, 1)$ , which we discretize with a grid of  $N = 250$   
 481 equidistant locations, thus we have  $\Delta x = 1/N$ . We consider zero-Dirichlet boundary conditions,  
 482 that is,  $u(0, t) = u(1, t) = 0$ . The discrete Laplacian is then

$$[L]_{ij} = \frac{1}{\Delta x^2} \cdot \begin{cases} -2 & \text{if } i = j, \\ 1 & \text{if } i = j \pm 1, \\ 0 & \text{otherwise.} \end{cases} \quad (104)$$

483 The non-linear part of the discretized Burger's equation results from another finite-difference approx-  
 484 imation of the term  $u \cdot \partial_x u$ , and is chosen as

$$[F(y)]_i = \frac{1}{4\Delta x} \begin{cases} y_2^2 & \text{if } i = 1, \\ y_{d-1}^2 & \text{if } i = d, \\ y_{i+1}^2 - y_{i-1}^2 & \text{else.} \end{cases} \quad (105)$$

485 The initial condition is chosen as

$$u(x, 0) = \sin(3\pi x)^3(1 - x)^{3/2}. \quad (106)$$

486 We consider an integration time-span  $t \in [0, 1]$ , and choose a diffusion coefficient  $D = 0.075$ .

## 487 D.2 Reaction-diffusion model

488 The reaction-diffusion model presented in the paper, with logistic reaction term, has been used to  
 489 describe the growth and spread of biological populations [21]. It is given by a semi-linear PDE

$$\partial_t u(x, t) = D\partial_x^2 u(x, t) + R(u(x, t)), \quad x \in \Omega, \quad t \in [0, T], \quad (107)$$

490 where  $D \in \mathbb{R}_+$  is the diffusion coefficient and  $R(u) = u(1 - u)$  is a logistic reaction term. We  
 491 discretize the spatial domain  $\Omega$  on a finite grid and approximate the spatial derivatives with finite  
 492 differences, and obtain a semi-linear ODE of the form

$$\dot{y}(t) = D \cdot L \cdot y(t) + R(y(t)), \quad t \in [0, T], \quad (108)$$

493 with  $N$ -dimensional  $y(t) \in \mathbb{R}^N$ ,  $L \in \mathbb{R}^{N \times N}$  the finite difference approximation of the Laplace  
 494 operator, and the reaction term  $R$  is as before but applied element-wise.

495 We again consider a domain  $\Omega = (0, 1)$ , which we discretize on a grid of  $N = 100$  points. This time  
 496 we consider zero-Neumann conditions, that is,  $\partial_x u(0, t) = \partial_x u(1, t) = 0$ . Including these directly  
 497 into the finite-difference discretization, the discrete Laplacian is then

$$[L]_{ij} = \frac{1}{\Delta x^2} \cdot \begin{cases} -1 & \text{if } i = j = 1 \text{ or } i = j = d, \\ -2 & \text{if } i = j, \\ 1 & \text{if } i = j \pm 1, \\ 0 & \text{otherwise.} \end{cases} \quad (109)$$

498 The initial condition is chosen as

$$u(x, 0) = \frac{1}{1 + e^{30x-10}}. \quad (110)$$

499 The discrete ODE is then solved on a time-span  $t \in [0, 2]$ , and we choose a diffusion coefficient  
 500  $D = 0.25$ .
